# Supplementary material for: Revisiting the oxygen reduction reaction activity of two-dimensional TM-C2N electrocatalysts via constant-potential density functional theory: crucial impact of the spin state and coordination
Source: Royal Society of Chemistry journal article supplement (doi:10.1039/d4cy01210k), 2024-12-16
Supplement: d4cy01210k1.pdf [file d4cy01210k1.pdf]

## Supporting Information

For

### Revisiting the Oxygen Reduction Reaction Activity of Two-Dimensional TM-C<sub>2</sub>N Electrocatalysts via Constant-Potential Density Functional Theory: Crucial Impact of Spin State and Coordination

Yashi Chen<sup>1,2,4</sup>, Mingyuan Yu<sup>\*1,2,3</sup>, Erjun Kan<sup>1,2,3</sup>, Si Lan<sup>4</sup>, Cheng Zhan<sup>\*1,2,3</sup>

<sup>1</sup>Engineering Research Center of Semiconductor Device Optoelectronic Hybrid Integration in Jiangsu Province, Nanjing 210094

<sup>2</sup>MIT Key Laboratory of Semiconductor Microstructure and Quantum Sensing, Nanjing University of Science and Technology, Nanjing 210094, China

<sup>3</sup>School of Physics, Nanjing University of Science and Technology, Nanjing 210094, China

<sup>4</sup>School of Materials Science and Engineering, Nanjing University of Science and Technology, Nanjing 210094, China

Corresponding author: [czhan@njust.edu.cn](mailto:czhan@njust.edu.cn)

#### Micro-kinetic method:

We assume that the reaction occurs on both the bare TM-C<sub>2</sub>N and TM-C<sub>2</sub>N with a single coordination. The reaction rate at the site is governed by the rate-limiting step. Thus, the reaction rate can be expressed as:

$$R(U) = \sum k_i(U)[C_i(U)] \#(S1)$$

$$k_i(U) = A_i \exp\left(\frac{-E_{a,i}}{k_B T}\right) \exp\left(\frac{-G_i^b(U)}{k_B T}\right) \#(S2)$$

$R(U)$  is the total reaction rate,  $C_i(U)$  is the concentration of various possible active sites.  $A_i$ ,  $E_{a,i}$  are effective pre-exponential factor and activation energy, which can be estimated to be 0.26 eV and  $1.23 \times 10^9 \text{ s}^{-1}$ .<sup>1,2</sup>  $k_B$  is Boltzmann constant.  $k_i(U)$  are the reaction rates in corresponding active sites. This can be determined using Eq. S2, derived from classical transition state theory. Additionally, the concentration  $G_i^b(U)$  is balanced based on the total site concentration, as given by the following formula:

$$[M] = \sum [C_i(U)] \#(S3)$$

where M is total concentration of active sites, which can be computed by active sites divided by surface area. Besides,  $C_i(U)$  follow the equilibrium constants:

$$K_i(U) = \frac{C_i(U)}{C_0(U)} = \exp\left(\frac{-G_i^f(U)}{kT}\right) \#(S4)$$

$C_0(U)$  is concentration of TM-C<sub>2</sub>N(IS), the  $G_i^b(U)$  is formation energy of various active site relative to TM-C<sub>2</sub>N(IS). Finally, the current density can be calculated as:

$$j(U) = \frac{nFR(U)}{N_A} \#(S5)$$

Where n is the charge transfer of reaction, F is Faraday constant, and  $N_A$  is the Avogadro constant. It should be noted that there is a limit to the reaction rate of ORR due to the solubility limit of oxygen.<sup>3</sup> The reaction rate changes to:

$$k_i(U) = \exp\left(\frac{-E_{a,i}}{k_B T}\right) \min\left(A_i \exp\left(\frac{-G_i^b(U)}{k_B T}\right), v_{O_2}\right) \#(S6)$$

The values of  $v_{O_2}$  is taken as  $1 \times 10^8 \text{ s}^{-1}$ .<sup>4</sup>

Table S1. Spin state and parameters of free energy fitting for each ORR intermediate.

| model                    | Spin | C (eV) | U <sub>0</sub> (V/SHE) | E <sub>0</sub> (eV) | E <sub>ZPE-T*S</sub> (eV) |
|--------------------------|------|--------|------------------------|---------------------|---------------------------|
| TiC <sub>2</sub> N*      | 1    | 2.39   | -2.86                  | -662.71             | 0.22                      |
| TiC <sub>2</sub> N*OOH   | 1/2  | 2.87   | -2.68                  | -678.80             | 0.61                      |
| TiC <sub>2</sub> N*O     | 0    | 2.38   | -2.71                  | -670.63             | 0.29                      |
| TiC <sub>2</sub> N*OH    | 1/2  | 2.32   | -2.79                  | -674.50             | 0.52                      |
| TiC <sub>2</sub> NOH*OOH | 0    | 2.45   | -2.70                  | -690.38             | 0.92                      |
| TiC <sub>2</sub> NOH*O   | 0    | 2.59   | -2.48                  | -683.08             | 0.58                      |
| TiC <sub>2</sub> NOH*OH  | 0    | 2.48   | -2.67                  | -686.34             | 0.84                      |
| VC <sub>2</sub> N*       | 3/2  | 2.78   | -2.63                  | -663.18             | 0.25                      |
| VC <sub>2</sub> N*OOH    | 1    | 2.86   | -2.58                  | -679.60             | 0.54                      |
| VC <sub>2</sub> N*O      | 1/2  | 2.97   | -2.51                  | -671.26             | 0.30                      |
| VC <sub>2</sub> N*OH     | 1    | 3.05   | -2.55                  | -675.22             | 0.54                      |
| VC <sub>2</sub> NOH*OOH  | 1    | 2.64   | -2.52                  | -691.68             | 0.87                      |
| VC <sub>2</sub> NOH*O    | 1/2  | 2.58   | -2.49                  | -683.48             | 0.60                      |
| VC <sub>2</sub> NOH*OH   | 1    | 2.45   | -2.56                  | -687.11             | 0.84                      |

|                          |     |      |       |         |      |
|--------------------------|-----|------|-------|---------|------|
| CrC <sub>2</sub> N*      | 2   | 2.32 | -2.00 | -659.70 | 0.23 |
| CrC <sub>2</sub> N*OOH   | 3/2 | 2.19 | -1.84 | -675.60 | 0.61 |
| CrC <sub>2</sub> N*O     | 1   | 2.61 | -1.65 | -666.81 | 0.28 |
| CrC <sub>2</sub> N*OH    | 3/2 | 2.19 | -1.79 | -671.42 | 0.54 |
| CrC <sub>2</sub> NOH*OOH | 3/2 | 2.43 | -1.70 | -686.82 | 0.86 |
| CrC <sub>2</sub> NOH*O   | 1   | 2.70 | -1.61 | -677.99 | 0.60 |
| CrC <sub>2</sub> NOH*OH  | 3/2 | 2.26 | -1.73 | -682.57 | 0.83 |
| MnC <sub>2</sub> N*      | 5/2 | 2.36 | -2.08 | -659.72 | 0.20 |
| MnC <sub>2</sub> N*OOH   | 2   | 2.15 | -1.84 | -675.97 | 0.60 |
| MnC <sub>2</sub> N*O     | 5/2 | 2.54 | -1.65 | -666.51 | 0.30 |
| MnC <sub>2</sub> N*OH    | 2   | 2.10 | -1.85 | -671.77 | 0.50 |
| MnC <sub>2</sub> NOH*OOH | 2   | 2.71 | -1.56 | -687.07 | 0.87 |
| MnC <sub>2</sub> NOH*O   | 2   | 3.02 | -1.41 | -677.89 | 0.61 |
| MnC <sub>2</sub> NOH*OH  | 2   | 2.45 | -1.64 | -682.60 | 0.89 |
| FeC <sub>2</sub> N*      | 2   | 0.92 | -0.64 | -636.83 | 0.25 |
| FeC <sub>2</sub> N*OOH   | 3/2 | 0.73 | -0.36 | -652.12 | 0.57 |
| FeC <sub>2</sub> N*O     | 2   | 0.80 | 0.13  | -642.86 | 0.29 |
| FeC <sub>2</sub> N*OH    | 3/2 | 1.15 | 0.24  | -648.17 | 0.53 |
| FeC <sub>2</sub> NOH*OOH | 2   | 0.77 | 0.04  | -662.94 | 0.83 |
| FeC <sub>2</sub> NOH*O   | 3/2 | 0.95 | 0.82  | -653.39 | 0.56 |
| FeC <sub>2</sub> NOH*OH  | 2   | 0.82 | 0.29  | -658.89 | 0.80 |
| CoC <sub>2</sub> N*      | 3/2 | 0.95 | -0.49 | -634.94 | 0.24 |
| CoC <sub>2</sub> N*OOH   | 1   | 0.72 | -0.24 | -650.40 | 0.54 |
| CoC <sub>2</sub> N*O     | 3/2 | 0.87 | 0.37  | -641.03 | 0.27 |
| CoC <sub>2</sub> N*OH    | 1   | 0.77 | 0.05  | -646.20 | 0.52 |
| CoC <sub>2</sub> NOH*OOH | 3/2 | 0.94 | 0.44  | -660.97 | 0.81 |
| CoC <sub>2</sub> NOH*O   | 3/2 | 1.04 | 0.94  | -651.47 | 0.58 |
| CoC <sub>2</sub> NOH*OH  | 3/2 | 0.92 | 0.50  | -656.76 | 0.82 |
| NiC <sub>2</sub> N*      | 1   | 1.40 | 0.17  | -633.61 | 0.25 |
| NiC <sub>2</sub> N*OOH   | 1/2 | 0.87 | 0.25  | -648.38 | 0.55 |
| NiC <sub>2</sub> N*O     | 1   | 0.99 | 0.73  | -638.94 | 0.26 |
| NiC <sub>2</sub> N*OH    | 1/2 | 0.81 | 0.22  | -644.47 | 0.53 |
| NiC <sub>2</sub> NOH*OOH | 1   | 0.82 | 0.65  | -658.82 | 0.84 |
| NiC <sub>2</sub> NOH*O   | 1/2 | 0.92 | 0.67  | -648.66 | 0.56 |
| NiC <sub>2</sub> NOH*OH  | 0   | 1.12 | 0.85  | -653.97 | 0.81 |
| CuC <sub>2</sub> N*      | 0   | 0.59 | -0.58 | -632.07 | 0.22 |
| CuC <sub>2</sub> N*OOH   | 0   | 0.89 | 0.43  | -647.02 | 0.53 |
| CuC <sub>2</sub> N*O     | 1/2 | 0.92 | 0.68  | -637.00 | 0.23 |

|                                      |     |      |      |         |      |
|--------------------------------------|-----|------|------|---------|------|
| $\text{CuC}_2\text{N}^*\text{OH}$    | 0   | 0.84 | 0.34 | -642.63 | 0.49 |
| $\text{CuC}_2\text{NOH}^*\text{OOH}$ | 1/2 | 0.79 | 0.46 | -657.13 | 0.80 |
| $\text{CuC}_2\text{NOH}^*\text{O}$   | 1/2 | 1.17 | 1.12 | -646.76 | 0.47 |
| $\text{CuC}_2\text{NOH}^*\text{OH}$  | 1/2 | 1.17 | 1.10 | -652.74 | 0.77 |

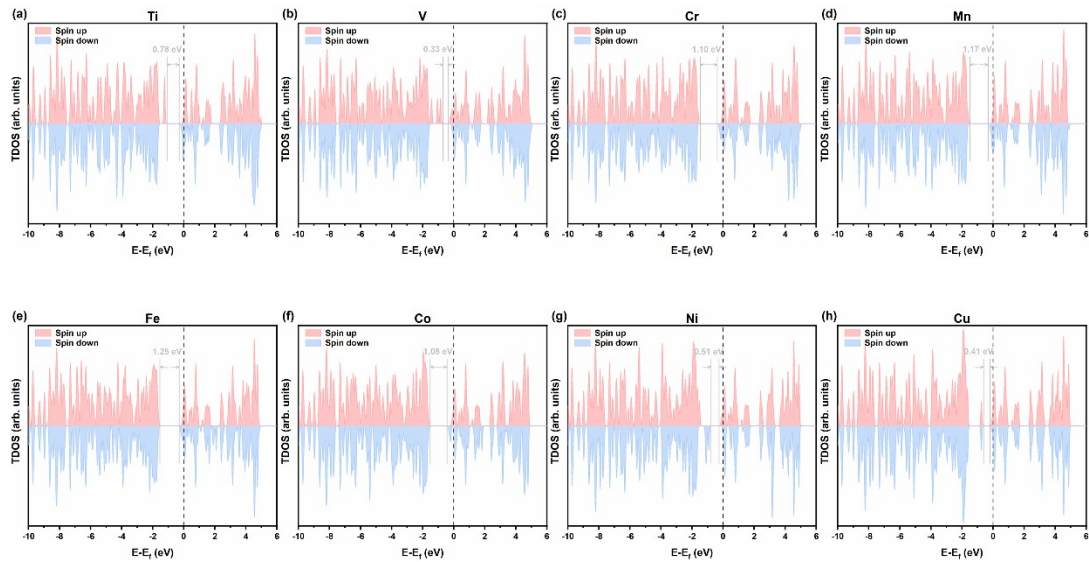

Figure S1. The total density of states of TM-C<sub>2</sub>N.

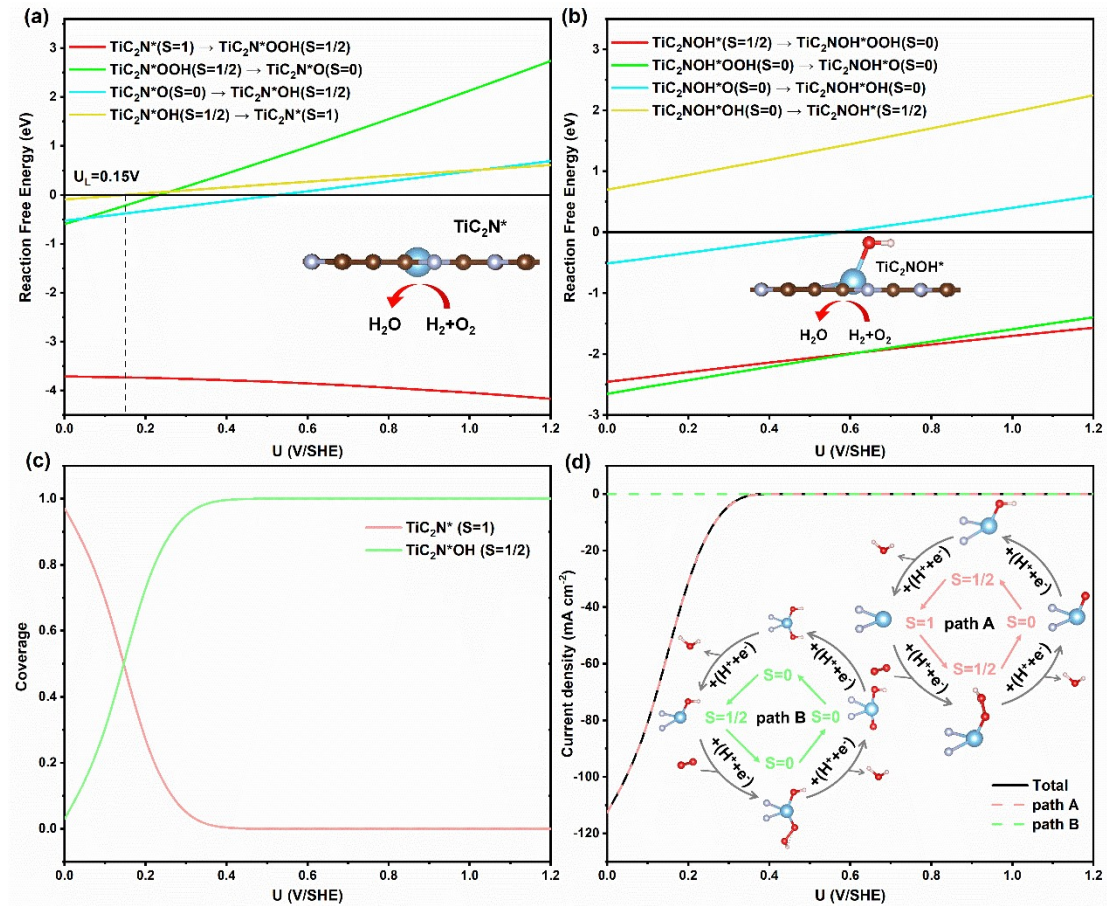

Figure S2. Constant-potential free energy of the ORR on (a)  $\text{TiC}_2\text{N}$  and (b)  $\text{TiC}_2\text{N}^*\text{OH}$ ; the coverage of  $\text{TiC}_2\text{N}$  and  $\text{TiC}_2\text{N}^*\text{OH}$  vs. electrode potential; (d) simulation of total polarization current.

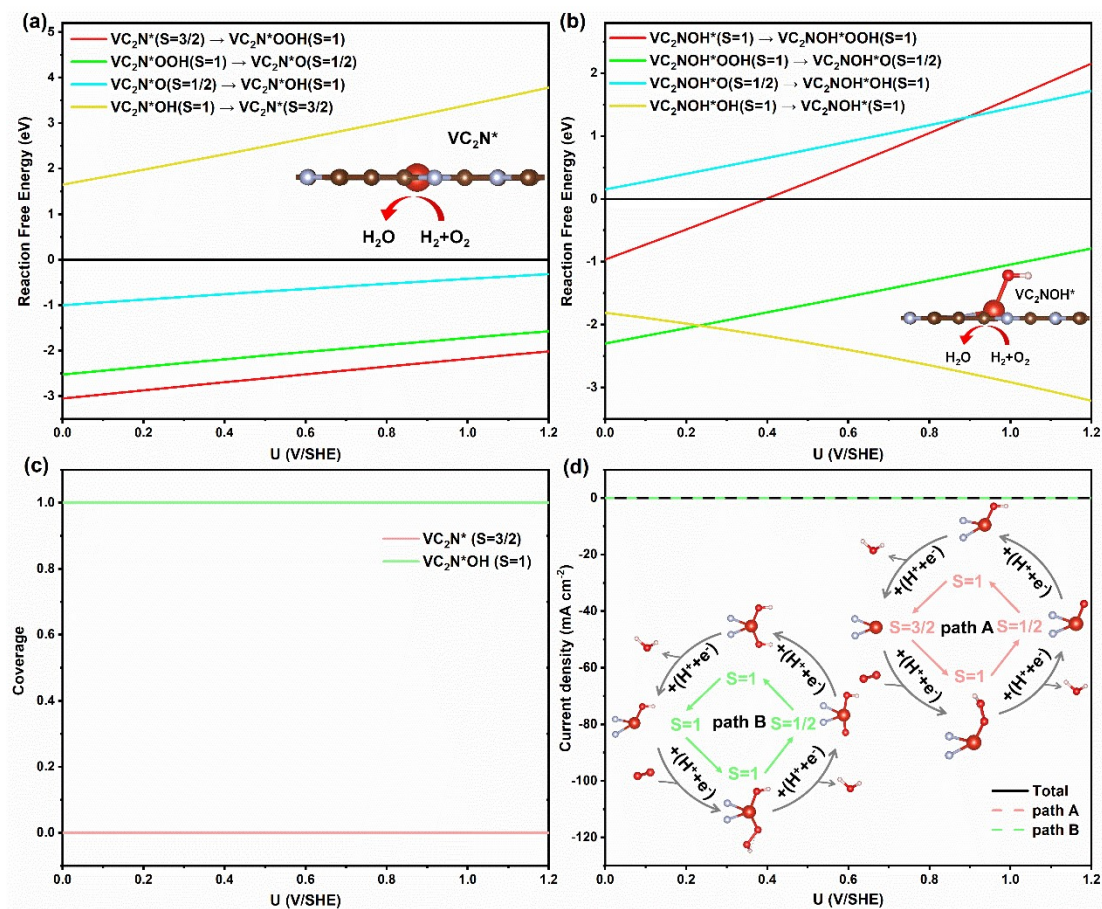

Figure S3. Constant-potential free energy of the ORR on (a)  $\text{VC}_2\text{N}$  and (b)  $\text{VC}_2\text{N}^*\text{OH}$ ; the coverage of  $\text{VC}_2\text{N}$  and  $\text{VC}_2\text{N}^*\text{OH}$  vs. electrode potential; (d) simulation of total polarization current.



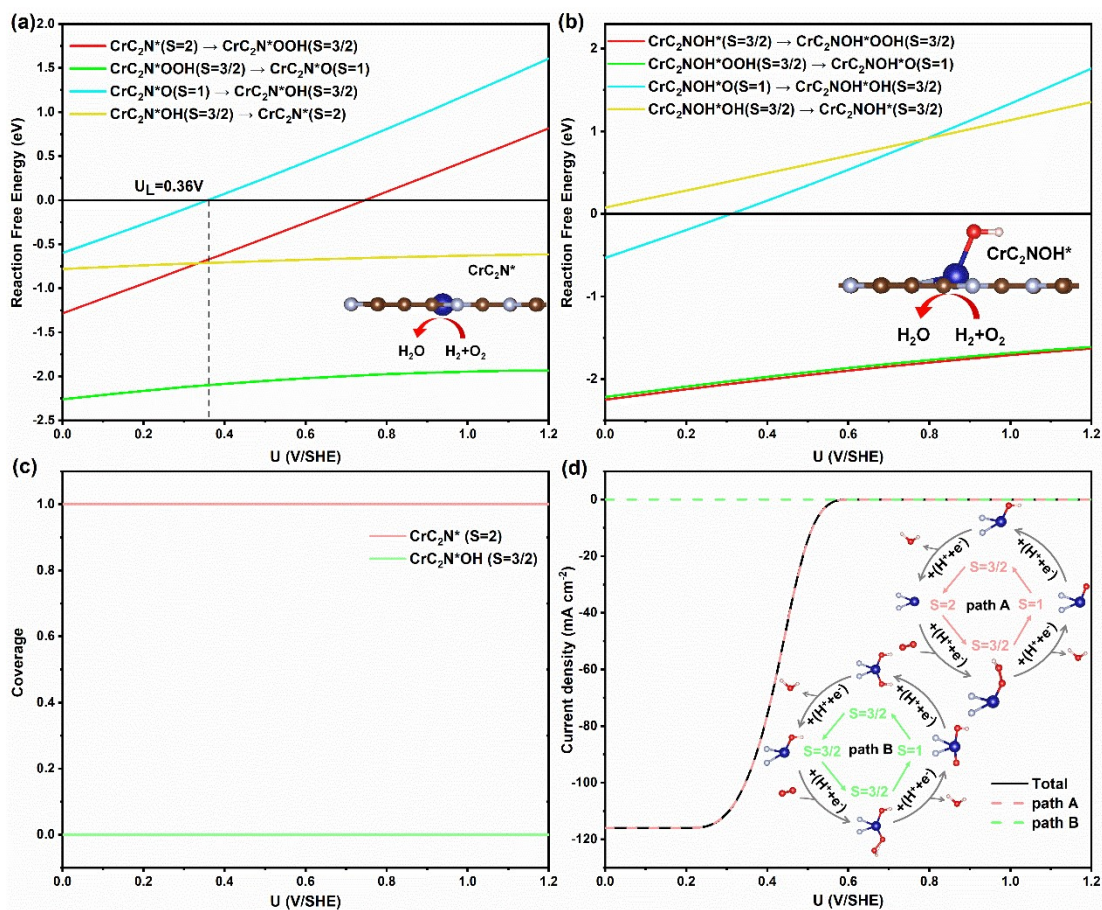

Figure S4. Constant-potential free energy of the ORR on (a) CrC<sub>2</sub>N and (b) CrC<sub>2</sub>N\*OH; the coverage of CrC<sub>2</sub>N and CrC<sub>2</sub>N\*OH vs. electrode potential; (d) simulation of total polarization current.

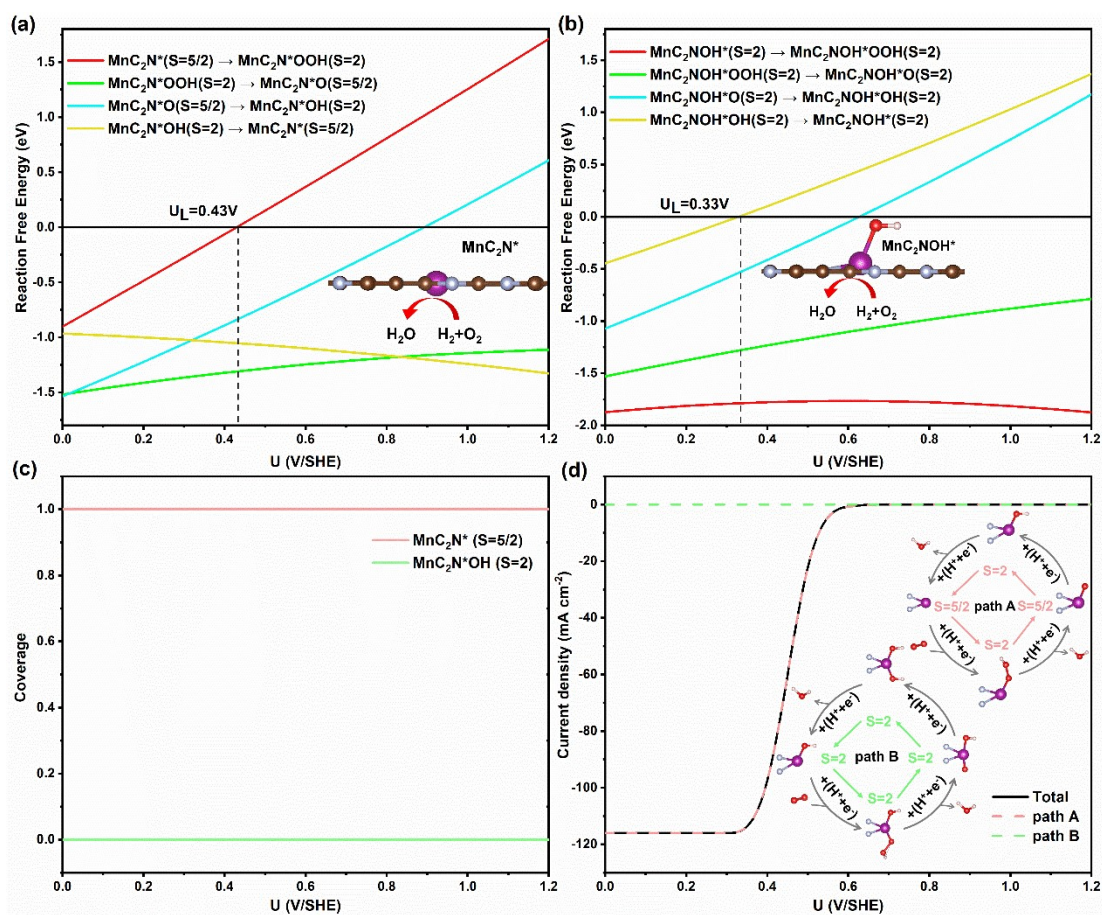

Figure S5. Constant-potential free energy of the ORR on (a) MnC<sub>2</sub>N and (b) MnC<sub>2</sub>N\*OH; the coverage of MnC<sub>2</sub>N and MnC<sub>2</sub>N\*OH vs. electrode potential; (d) simulation of total polarization current.

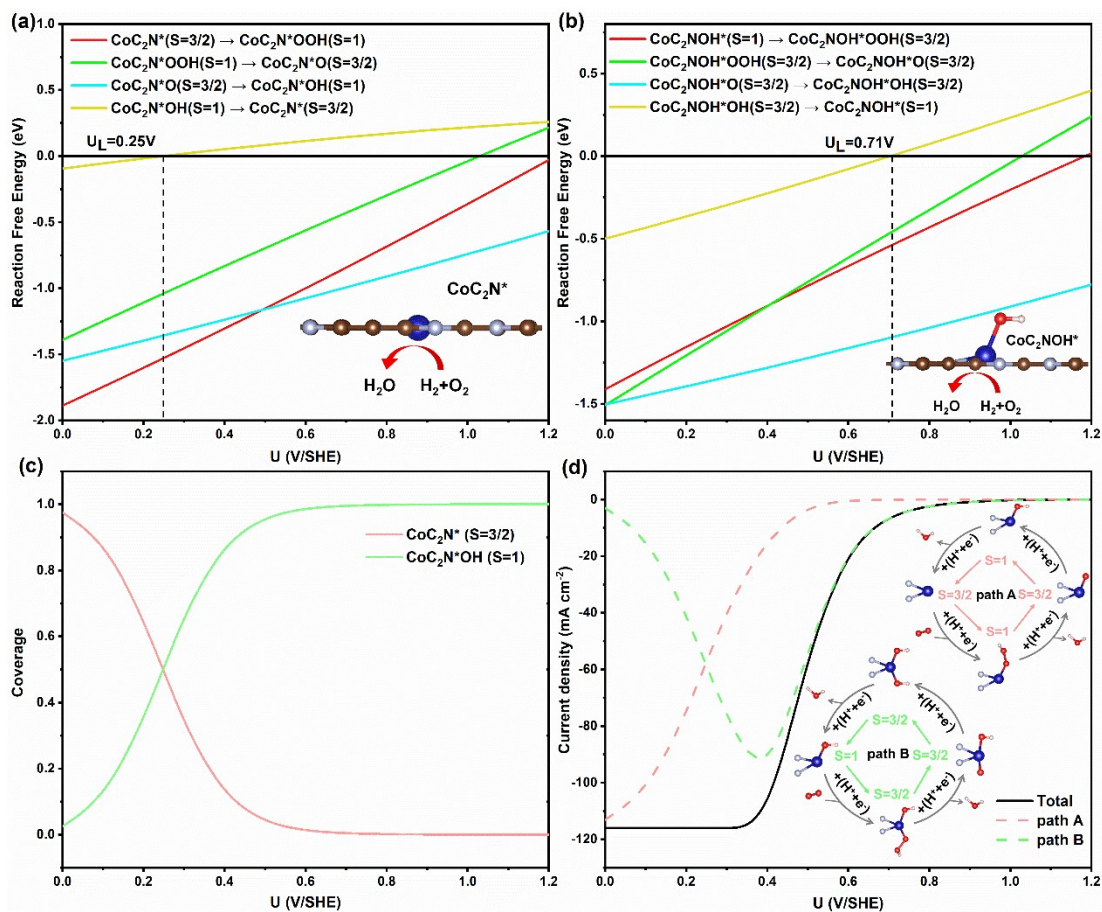

Figure S6. Constant-potential free energy of the ORR on (a) CoC<sub>2</sub>N and (b) CoC<sub>2</sub>N\*OH; the coverage of CoC<sub>2</sub>N and CoC<sub>2</sub>N\*OH vs. electrode potential; (d) simulation of total polarization current.



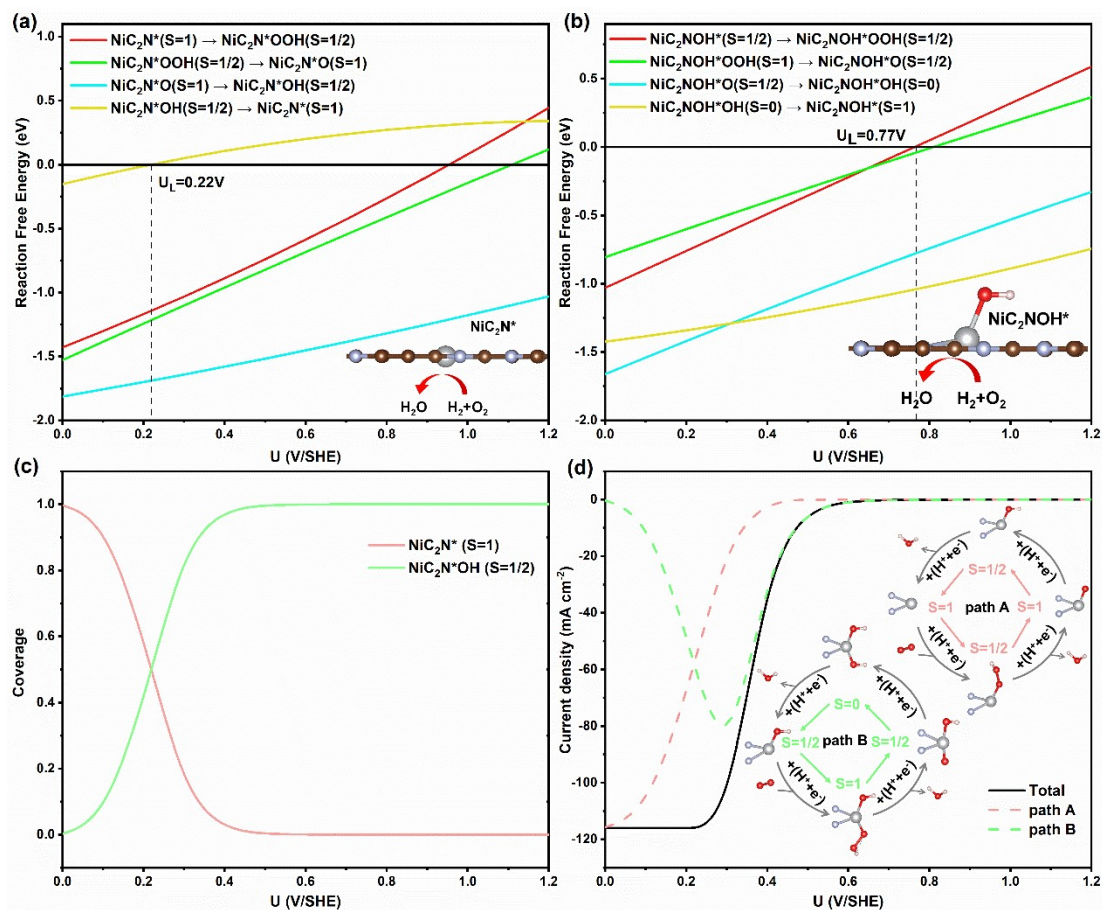

Figure S7. Constant-potential free energy of the ORR on (a) NiC<sub>2</sub>N and (b) NiC<sub>2</sub>N\*OH; the coverage of NiC<sub>2</sub>N and NiC<sub>2</sub>N\*OH vs. electrode potential; (d) simulation of total polarization current.

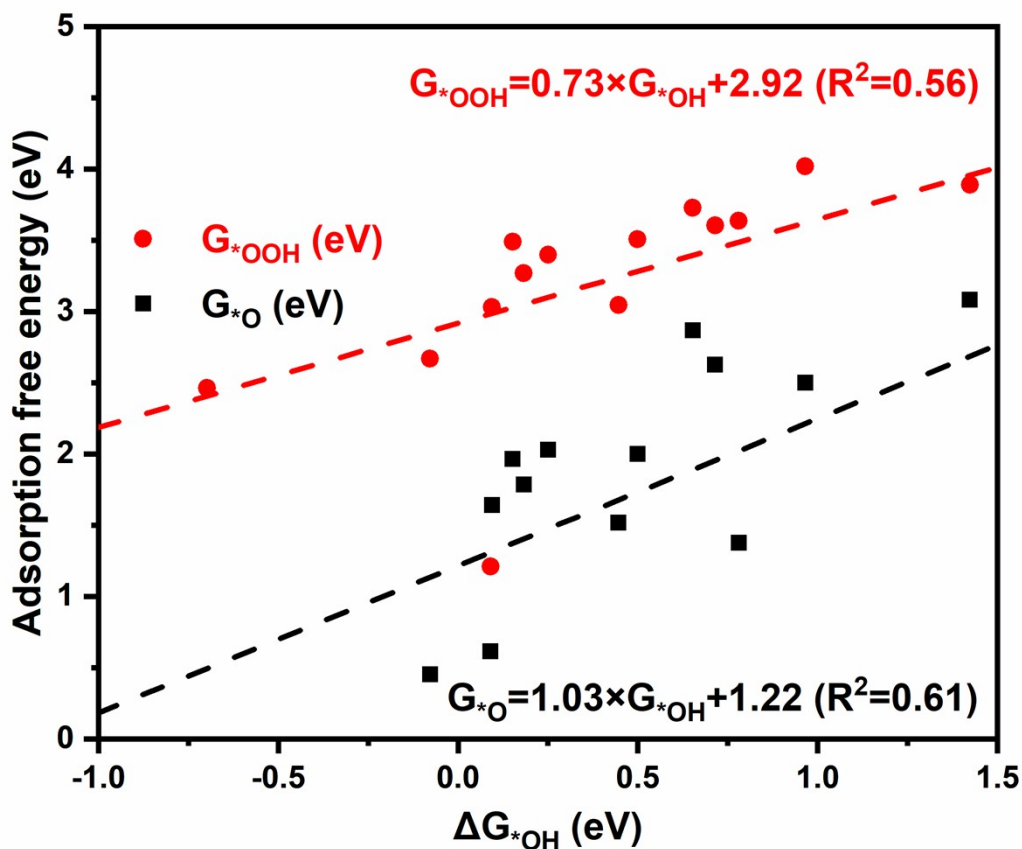

Figure S8. The linear fitting of adsorption free energy of  $G_{*OOH}$  and  $G_{*O}$  vs.  $G_{*OH}$

#### References:

1. Y. Wang, Y.-J. Tang and K. Zhou, *J. Am. Chem. Soc.*, 2019, **141**, 14115-14119.
2. D. T. Limmer, A. P. Willard, P. Madden and D. Chandler, *Proc. Natl. Acad. Sci.*, 2013, **110**, 4200-4205.
3. Z. Huang and Q. Tang, *J. Phys. Chem. C*. 2022, **126**, 21606-21615.
4. H. A. Hansen, V. Viswanathan and J. K. Nørskov, *J. Phys. Chem. C*. 2014, **118**, 6706-6718.
